# Supplementary material
Source: publisher site journal article supplement (https://www.dovepress.com/article/129255)
Supplement: Supplementary file 1 [file get_supplementary_file.php]

Medical\_Geriatric\_Articles\_N\_49

| Surname     | First | Year | Journal                   | Volume | Page-1 | Page-L | Pages | N    | Speed-Ons |
|-------------|-------|------|---------------------------|--------|--------|--------|-------|------|-----------|
| Adamis      | D     | 2009 | Age Ageing                | 38     | 326    | 332    | 6     | 67   | N         |
| Al-Aama     | T     | 2011 | Int J Ger Psych           | 26     | 687    | 697    | 10    | 145  | N         |
| Anderson    | C     | 2010 | JAGS                      | 58     | 178    | 179    | 1     | 350  | N         |
| Andrew      | M     | 2009 | Age Ageing                | 28     | 241    | 244    | 3     | 124  | N         |
| Bellelli    | G     | 2007 | J Geront Med Sci          | 62     | 1306   | 1309   | 3     | 1278 | N         |
| Bo          | M     | 2009 | Am J Ger Psych            | 17     | 760    | 768    | 8     | 252  | N         |
| Bourdel-M&l |       | 2004 | J Geront Med Sci          | 59     | 350    | 354    | 4     | 427  | N         |
| Brietbart   | W     | 1997 | J Pain Symp Man           | 13     | 128    | 137    | 9     | 51   | N         |
| Breitbart   | W     | 2002 | Psychosomatics            | 43     | 175    | 182    | 7     | 79   | N         |
| Briskman    | I     | 2010 | Psychogeriatrics          | 22     | 328    | 331    | 3     | 191  | N         |
| Caplan      | G     | 2006 | Age Ageing                | 35     | 53     | 60     | 7     | 104  | N         |
| Cerejera    | J     | 2011 | Age Ageing                | 40     | 621    | 626    | 5     | 101  | N         |
| Collins     | N     | 2010 | Age Ageing                | 39     | 131    | 135    | 4     | 710  | N         |
| Dahl        | M     | 2010 | Acta Neurol Scan          | 122    | 39     | 43     | 4     | 178  | N         |
| Dautzenbe   | P     | 2004 | Int J Ger Psych           | 19     | 641    | 644    | 3     | 366  | N         |
| De Jonghe   | J     | 2005 | Int J Ger Psych           | 20     | 1158   | 1166   | 8     | 92   | N         |
| De Jonghe   | O     | 2007 | Am J Ger Psych            | 15     | 112    | 121    | 9     | 430  | N         |
| De Rooij    | S     | 2006 | Int J Ger Psych           | 21     | 876    | 882    | 6     | 65   | N         |
| De Rooij    | S     | 2007 | J Psychosom Res           | 62     | 521    | 525    | 4     | 185  | N         |
| Elie        | M     | 2000 | CMAJ                      | 163    | 977    | 981    | 4     | 447  | N         |
| Elie        | M     | 2009 | Intern Psychoger          | 21     | 588    | 592    | 4     | 326  | N         |
| Eriksson    | I     | 2011 | Intern Psychoger          | 23     | 496    | 502    | 6     | 504  | N         |
| Farrell     | K     | 1995 | Arch Intern Med           | 155    | 2459   | 2464   | 5     | 67   | N         |
| Flaherty    | J     | 2010 | J Geront Med Sci          | 65     | 1387   | 1392   | 5     | 138  | N         |
| Flores      | F     | 2010 | JAGS                      | 58     | 63     | 64     | 1     | 542  | N         |
| Fong        | T     | 2009 | Neurology                 | 72     | 1570   | 1575   | 5     | 408  | N         |
| Francis     | J     | 1990 | JAMA                      | 263    | 1097   | 1101   | 4     | 229  | N         |
| Gamberini   | M     | 2009 | Crit Care Med             | 37     | 1762   | 1768   | 6     | 113  | N         |
| Gaudreau    | J     | 2005 | Gen Hosp Psych            | 27     | 194    | 199    | 5     | 146  | N         |
| George      | J     | 1997 | Age Ageing                | 26     | 423    | 427    | 4     | 171  | N         |
| Givens      | J     | 2009 | JAGS                      | 57     | 1347   | 1353   | 6     | 459  | N         |
| Gonzalez    | M     | 2004 | Psychosomatics            | 45     | 426    | 431    | 5     | 123  | N         |
| Chong       | C     | 2010 | Intern Med J              | 40     | 751    | 756    | 5     | 102  | N         |
| Cole        | M     | 1994 | CMAJ                      | 151    | 965    | 970    | 5     | 88   | N         |
| Cole        | M     | 2002 | CMAJ                      | 167    | 753    | 759    | 6     | 227  | N         |
| Cole        | M     | 2002 | J Neuropsych Clin Neurosc | 14     | 167    | 175    | 8     | 322  | N         |
| Cole        | M     | 2003 | JAGS                      | 51     | 754    | 760    | 6     | 164  | N         |
| Cole        | M     | 2011 | JAGS                      | 59     | 1829   | 1836   | 7     | 104  | N         |
| Han         | L     | 2001 | Arch Intern Med           | 161    | 1099   | 1105   | 6     | 278  | N         |
| Han         | J     | 2009 | Academ Emerg Med          | 16     | 193    | 200    | 7     | 303  | N         |
| Han         | J     | 2009 | JAGS                      | 57     | 889    | 894    | 5     | 341  | N         |
| Holden      | J     | 2008 | Intern Med J              | 38     | 629    | 634    | 5     | 317  | N         |
| Holmes      | C     | 2011 | Neurology                 | 77     | 212    | 218    | 6     | 275  | N         |
| Hufschmid   | A     | 2008 | Acta Neurol Scand         | 118    | 245    | 250    | 5     | 294  | N         |
| Hustey      | F     | 2002 | Ann Emerg Med             | 39     | 248    | 253    | 5     | 297  | N         |
| Hustey      | F     | 2003 | Ann Emerg Med             | 41     | 676    | 684    | 8     | 271  | N         |
| Inouye      | S     | 1990 | Ann Intern Med            | 113    | 941    | 948    | 7     | 56   | N         |
| Inouye      | S     | 1993 | Ann Intern Med            | 119    | 474    | 481    | 7     | 107  | N         |
| Inouye      | S     | 1994 | Am J Med                  | 97     | 278    | 288    | 10    | 56   | N         |
| Inouye      | S     | 1996 | JAMA                      | 275    | 852    | 857    | 5     | 192  | N         |
| Inouye      | S     | 1998 | J Gen Intern Med          | 13     | 234    | 242    | 8     | 727  | N         |
| Inouye      | S     | 1998 | J Ger Psych Neur          | 11     | 118    | 125    | 7     | 625  | N         |
| Inouye      | S     | 1999 | NEJM                      | 340    | 669    | 676    | 7     | 852  | N         |
| Inouye      | S     | 2000 | JAGS                      | 48     | 1697   | 1706   | 9     | 1507 | N         |
| Inouye      | S     | 2001 | Arch Intern Med           | 161    | 2467   | 2473   | 6     | 797  | N         |

Medical\_Geriatric\_Articles\_N\_49

|           |   |                                 |     |      |      |    |        |
|-----------|---|---------------------------------|-----|------|------|----|--------|
| Inouye    | S | 2003 Arch Intern Med            | 163 | 958  | 964  | 6  | 1422 N |
| Inouye    | S | 2007 Arch Intern Med            | 167 | 1406 | 1413 | 7  | 952 Y  |
| Iseli     | R | 2007 Intern Med J               | 37  | 806  | 811  | 5  | 104 N  |
| Jabbar    | F | 2011 Intern Psychoger           | 23  | 1167 | 1174 | 7  | 80 N   |
| Jeffer    | K | 2008 Intern Med J               | 38  | 121  | 122  | 1  | 648 N  |
| Kakuma    | R | 2003 JAGS                       | 51  | 443  | 450  | 7  | 1268 N |
| Laurila   | J | 2002 Int J Ger Psych            | 17  | 1112 | 1119 | 7  | 81 N   |
| Laurila   | J | 2008 J Psychosom Res            | 65  | 249  | 255  | 6  | 87 N   |
| Lemiengre | J | 2006 JAGS                       | 54  | 685  | 689  | 4  | 258 N  |
| Leslie    | D | 2008 Arch Intern Med            | 168 | 27   | 32   | 5  | 841 N  |
| Leung     | J | 2008 Gen Hosp Psych             | 30  | 171  | 176  | 5  | 100 N  |
| Levkoff   | S | 1996 Am J Ger Psych             | 4   | 320  | 329  | 9  | 250 N  |
| Liptzin   | B | 1992 Brit J Psych               | 161 | 843  | 845  | 2  | 326 N  |
| Liptzin   | B | 2005 Am J Ger Psych             | 13  | 1100 | 1106 | 6  | 80 N   |
| Lu        | J | 2009 JAGS                       | 57  | 1725 | 1726 | 1  | 142 N  |
| Lundstrom | M | 2005 JAGS                       | 53  | 622  | 628  | 6  | 400 N  |
| Macdonald | A | 2007 Age Ageing                 | 36  | 222  | 225  | 3  | 94 N   |
| Martin    | N | 2000 Intern Psychoger           | 12  | 117  | 127  | 10 | 156 Y  |
| McAvay    | G | 2006 JAGS                       | 54  | 1245 | 1250 | 7  | 433 N  |
| McAvay    | G | 2007 JAGS                       | 55  | 684  | 691  | 5  | 416 N  |
| McManus   | J | 2009 Age Ageing                 | 38  | 385  | 389  | 4  | 82 N   |
| McCusker  | J | 2001 CMAJ                       | 165 | 575  | 583  | 8  | 315 N  |
| McCusker  | J | 2001 JAGS                       | 49  | 1327 | 1334 | 7  | 444 Y  |
| McCusker  | J | 2002 Arch Intern Med            | 162 | 457  | 463  | 6  | 361 N  |
| McCusker  | J | 2003 JAGS                       | 51  | 1539 | 1546 | 7  | 332 N  |
| McCusker  | J | 2004 JAGS                       | 52  | 1744 | 1749 | 5  | 500 N  |
| Meagher   | D | 2010 JNNP                       | 81  | 876  | 881  | 5  | 140 N  |
| Mittal    | D | 2006 Psychosomatics             | 47  | 367  | 375  | 8  | 213 N  |
| Miyaji    | S | 2007 Psych Clin Neurosci        | 61  | 275  | 282  | 7  | 266 N  |
| Naughton  | B | 2005 JAGS                       | 53  | 18   | 23   | 5  | 110 N  |
| Neufeld   | K | 2011 Psychosomatics             | 52  | 133  | 140  | 13 | 139 N  |
| O'Keefe   | S | 1996 Gerontology                | 42  | 36   | 39   | 3  | 60 N   |
| O'Keefe   | S | 1997 JAGS                       | 45  | 470  | 473  | 3  | 110 N  |
| O'Keefe   | S | 1996 Age Ageing                 | 25  | 317  | 321  | 3  | 225 N  |
| O'Keefe   | S | 2005 JAGS                       | 53  | 867  | 870  | 3  | 165 N  |
| Oldenbeuv | A | 2008 BMC Neurology              | 8   | 34   | 35   | 1  | 527 N  |
| Overshott | R | 2010 Intern Psychoger           | 22  | 812  | 818  | 6  | 84 N   |
| Parellada | E | 2004 J Clin Psych               | 65  | 348  | 353  | 1  | 64 N   |
| Pitkala   | K | 2006 J Geront Med Sci           | 61  | 176  | 181  | 5  | 174 N  |
| Pompei    | P | 1994 JAGS                       | 42  | 809  | 815  | 6  | 755 N  |
| Pompei    | P | 1995 Arch Intern Med            | 155 | 301  | 307  | 6  | 432 N  |
| Rahkonen  | T | 2000 JNNP                       | 69  | 519  | 521  | 2  | 51 N   |
| Rizzo     | J | 2001 Medical Care               | 39  | 740  | 752  | 12 | 852 N  |
| Rockwood  | K | 1989 JAGS                       | 37  | 150  | 154  | 4  | 80 N   |
| Rockwood  | K | 1993 J Geront Med Sci           | 48  | 162  | 166  | 4  | 168 N  |
| Rockwood  | K | 1996 JAGS                       | 44  | 839  | 842  | 4  | 104 N  |
| Rockwood  | K | 1999 Age Ageing                 | 28  | 551  | 556  | 3  | 203 N  |
| Rosen     | J | 1994 J Neuropsych Clin Neurosci | 6   | 30   | 35   | 5  | 791 N  |
| Rudberg   | M | 1997 Age Ageing                 | 26  | 169  | 174  | 5  | 432 N  |
| Sanchez   | E | 2010 JAGS                       | 58  | 63   | 64   | 1  | 200 N  |
| Sandberg  | O | 1999 JAGS                       | 47  | 1300 | 1306 | 6  | 717 N  |
| Sheng     | A | 2006 JAGS                       | 54  | 1192 | 1198 | 6  | 156 N  |
| Mudge     | A | 2008 JAGS                       | 56  | 630  | 635  | 5  | 124 N  |
| Murray    | A | 1993 J Geront Med Sci           | 48  | 181  | 186  | 5  | 325 N  |
| Sylvestre | M | 2006 Intern Psychoger           | 18  | 667  | 680  | 13 | 230 N  |
| Tabet     | N | 2005 Age Ageing                 | 34  | 152  | 156  | 4  | 250 N  |

Medical\_Geriatric\_Articles\_N\_49

|              |      |                            |     |      |      |    |          |
|--------------|------|----------------------------|-----|------|------|----|----------|
| Thomas C     | 2008 | BMC Neurosci               | 9   | 86   | 87   | 1  | 61 N     |
| Trzepacz P   | 2001 | J Neuropsych Clin Neurosc  | 13  | 229  | 242  | 13 | 142 N    |
| Uguz F       | 2010 | Perspectives Psych Care    | 46  | 135  | 142  | 7  | 212 N    |
| van Gerner L | 2007 | BMC Nursing                | 6   | 3    | 4    | 1  | 87 N     |
| Vidan M      | 2009 | JAGS                       | 57  | 2029 | 2036 | 4  | 542 N    |
| White S      | 2005 | Age Ageing                 | 34  | 603  | 608  | 5  | 283 N    |
| Woodford H   | 2011 | JAGS                       | 59  | 793  | 568  | 1  | 61 N     |
| Zou Y        | 1998 | Intern Psychoger           | 10  | 303  | 308  | 5  | 87 N     |
| Campbell N   | 2011 | JAGS                       | 59  | 277  | 281  | 4  | 145 N    |
| Rudolph J    | 2011 | JAGS                       | 59  | 289  | 294  | 5  | 100 N    |
| Ciampi A     | 2011 | Intern Psychoger           | 10  | 1659 | 1670 | 12 | 444 N    |
| Cole M       | 2008 | Int J Ger Psych            | 23  | 301  | 307  | 7  | 268 N    |
| Lai M        | 2012 | Intern Med J               | 42  | 422  | 427  | 6  | 300 N    |
| Eeles E      | 2012 | Age Ageing                 | 41  | 412  | 416  | 5  | 273 N    |
| Foy A        | 1995 | J Geront Med Sci           | 50  | 99   | 106  | 7  | 418 N    |
| Schor J      | 1992 | JAMA                       | 267 | 827  | 831  | 5  | 325 N    |
| Fong T       | 2012 | Ann Intern Med             | 156 | 848  | 856  | 9  | 771 N    |
| Grover S     | 2011 | J Psychosom Res            | 71  | 277  | 281  | 5  | 72 N     |
| Iwashyna T   | 2010 | JAMA                       | 304 | 1787 | 1794 | 8  | 1194 N   |
| Lakhan P     | 2011 | JAGS                       | 59  | 2001 | 2008 | 7  | 577 N    |
| Holttä E     | 2011 | Am J Ger Psych             | 19  | 1034 | 1041 | 7  | 425 N    |
| Grover S     | 2012 | Intern Psychoger           | 24  | 117  | 127  | 10 | 488 N    |
| Watkin L     | 2012 | Int J Ger Psych            | 27  | 76   | 82   | 5  | 710 N    |
| Boettger S   | 2011 | Intern Psychoger           | 10  | 1671 | 1676 | 6  | 101 N    |
| Thomas C     | 2012 | JAGS                       | 60  | 1471 | 1477 | 7  | 79 N     |
| Gross A      | 2012 | Arch Intern Med            | 172 | 1324 | 1331 | 8  | 263 N    |
| Martinez F   | 2012 | Age Ageing                 | 41  | 629  | 634  | 6  | 287 N    |
| McDowell J   | 1998 | JAGS                       | 46  | 700  | 405  | 6  | 175 N    |
| Ting C       | 2012 | MJA                        | 197 | 442  | 443  | 2  | 184 N    |
| Carin-Levy G | 2012 | J Neurol                   | 259 | 1590 | 1599 | 10 | 2985 Y   |
| Treloar A    | 1997 | Int J Ger Psych            | 12  | 609  | 613  | 4  | 80 N     |
| Kales H      | 2003 | J Ger Psych Neur           | 16  | 32   | 38   | 7  | 267947 N |
| Inouye S     | 2005 | JAGS                       | 53  | 312  | 318  | 7  | 919 N    |
| Saczynski J  | 2014 | JAGS                       | 62  | 518  | 524  | 7  | 300 N    |
| Regal P      | 2014 | Am J Ger Psych             | 22  | 420  | 420  | 1  | 101 Y    |
| Vardy E      | 2014 | Int J Ger Psych            | 29  | 178  | 181  | 4  | 180 N    |
| Whittamore K | 2014 | Int J Ger Psych            | 29  | 32   | 40   | 9  | 249 N    |
| Hatta K      | 2014 | Int J Ger Psych            | 29  | 253  | 262  | 10 | 2453 N   |
| Wanich C     | 1992 | J Nurs Scholar             | 24  | 201  | 220  | 20 | 135 N    |
| Bogardus S   | 2003 | Am J Med                   | 114 | 383  | 390  | 8  | 705 N    |
| Pitkala K    | 2005 | Dem Ger Cog Dis            | 19  | 158  | 163  | 6  | 425 N    |
| Adamis D     | 2006 | Arch Gerontol Geri         | 43  | 289  | 298  | 9  | 94 N     |
| Levkoff S    | 1994 | Am J Ger Psych             | 2   | 230  | 238  | 9  | 325 N    |
| Caerio L     | 2004 | J Neurol                   | 11  | 171  | 178  | 9  | 218 Y    |
| Sandberg O   | 2001 | JAGS                       | 49  | 391  | 397  | 7  | 133 N    |
| Steis M      | 2012 | JAGS                       | 60  | 2121 | 2126 | 6  | 52 N     |
| Benedict L   | 2009 | Int J Older People Nursing | 4   | 194  | 202  | 9  | 67 N     |
| Nagley S     | 1986 | J Gerontol Nurs            | 12  | 27   | 31   | 5  | 60 N     |
| Robinson S   | 2008 | Res Theory Nurs Prac       | 22  | 103  | 113  | 11 | 160 N    |
| Young L      | 2003 | Age Ageing                 | 32  | 525  | 528  | 4  | 336 N    |
| Dunne J      | 1986 | Aust NZ J Med              | 16  | 771  | 778  | 8  | 387 N    |
| Fann J       | 2002 | Cancer                     | 95  | 1971 | 1981 | 11 | 90 N     |
| Katz I       | 2001 | Am J Ger Psych             | 9   | 148  | 159  | 12 | 96 N     |
| Koponen H    | 1989 | Psychol Med                | 19  | 605  | 609  | 5  | 86 N     |
| Koponen H    | 1989 | Acta Psych Scand           | 79  | 579  | 585  | 7  | 70 N     |
| O'Malley G   | 2008 | J Psychosom Res            | 65  | 223  | 228  | 6  | 184 N    |

Medical\_Geriatric\_Articles\_N\_49

|               |      |                         |     |       |       |    |        |
|---------------|------|-------------------------|-----|-------|-------|----|--------|
| Ramirez-B J   | 2008 | Gen Hosp Psych          | 30  | 337   | 343   | 7  | 51 N   |
| Rahkonen T    | 2001 | Int J Ger Psych         | 16  | 415   | 421   | 7  | 199 N  |
| Shi Q         | 2012 | Stroke                  | 43  | 645   | 649   | 5  | 2004 N |
| Oldenbeuv A   | 2013 | Am J Ger Psych          | 21  | 935   | 937   | 3  | 527 N  |
| Bellelli G    | 2014 | Age Ageing              | 43  | 496   | 502   | 7  | 236 N  |
| Inouye S      | 2006 | J Gen Int Med           | 21  | 1276  | 1281  | 5  | 460 N  |
| Scott I       | 2014 | Intern Med J            | 44  | 161   | 171   | 11 | 311 N  |
| Webster R     | 2000 | Psychosomatics          | 41  | 519   | 522   | 4  | 227 N  |
| Rahkonen T    | 2001 | Intern Psychoger        | 13  | 37    | 49    | 13 | 102 N  |
| Wakefield B   | 2002 | Clin Nurs Res           | 11  | 153   | 172   | 20 | 117 N  |
| Ranhoff A     | 2006 | Aging Clin Exp Res      | 18  | 440   | 444   | 5  | 401 N  |
| Villalpando J | 2003 | Intern Psychoger        | 15  | 325   | 336   | 11 | 667 N  |
| Foreman M     | 1989 | Res Nurs Health         | 12  | 21    | 29    | 8  | 71 N   |
| Morandi A     | 2014 | JAMDA                   | 15  | 349   | 354   | 6  | 2642 N |
| Meagher D     | 2014 | Intern Psychoger        | 26  | 693   | 702   | 10 | 487 N  |
| Leonard M     | 2009 | Psychosomatics          | 50  | 506   | 514   | 15 | 100 N  |
| Trzepacz P    | 2012 | J Psychosom Res         | 75  | 10    | 17    | 8  | 859 N  |
| Marcantoni E  | 2013 | JAGS                    | 61  | 510   | 511   | 2  | 201 N  |
| Eeles E       | 2013 | Aust J Ageing           | 32  | 60    | 63    | 4  | 412 N  |
| Isaia G       | 2009 | Age                     | 31  | 109   | 117   | 9  | 144 N  |
| Sandberg O    | 1998 | Scand J Soc Med         | 26  | 56    | 62    | 5  | 717 N  |
| Tomas-Ma F    | 2012 | Age Ageing              | 41  | 629   | 634   | 6  | 287 N  |
| Allen K       | 2011 | J Clin Outcome Man      | 18  | 253   | 258   | 6  | 199 N  |
| Tabet N       | 2006 | Int J Ger Psych         | 21  | 493   | 497   | 5  | 236 N  |
| Travers C     | 2013 | Intern Med J            | 43  | 262   | 269   | 8  | 493 N  |
| Speed G       | 2007 | Aust J Adv Nurs         | 25  | 38    | 43    | 6  | 1209 N |
| Saravay S     | 2004 | Psychosomatics          | 45  | 235   | 242   | 8  | 93 N   |
| Miu D         | 2013 | Geriatr Gerontol Int    | 13  | 123   | 129   | 7  | 314 N  |
| Khurana V     | 2011 | Geriatr Gerontol Int    | 11  | 467   | 473   | 7  | 400 Y  |
| Gustafson Y   | 1991 | Cerebrovasc Dis         | 1   | 257   | 264   | 8  | 145 N  |
| McManus J     | 2009 | Int J Ger Psych         | 24  | 1251  | 1256  | 6  | 82 N   |
| Breitbart W   | 2002 | Psychosomatics          | 43  | 183   | 194   | 12 | 101 N  |
| Gagnon P      | 2002 | J Pal Care              | 18  | 253   | 261   | 9  | 124 N  |
| Morita T      | 2007 | J Pain Symp Man         | 34  | 579   | 589   | 11 | 560 N  |
| Rudolph J     | 2010 | JAGS                    | 58  | 1542  | 1548  | 7  | 827 N  |
| Marcantoni E  | 2008 | JAGS                    | 56  | 1522  | 1527  | 6  | 50 N   |
| Yang F        | 2008 | JAGS                    | 56  | 1479  | 1484  | 6  | 779 N  |
| Jones R       | 2006 | J Geront Med Sci        | 61  | 1307  | 1311  | 5  | 952 N  |
| Fox M         | 2012 | JAGS                    | 60  | 2237  | 2245  | 9  | 1154 N |
| Asplund K     | 2000 | JAGS                    | 48  | 1381  | 1388  | 8  | 413 N  |
| Laurila J     | 2003 | Dem Ger Cog Dis         | 16  | 156   | 162   | 7  | 425 N  |
| Albert M      | 1992 | J Ger Psych Neur        | 5   | 14    | 21    | 8  | 50 N   |
| Bradshaw L    | 2013 | Int J Ger Psych         | 28  | 681   | 690   | 10 | 180 N  |
| Goldberg S    | 2012 | Age Ageing              | 41  | 80    | 87    | 7  | 250 N  |
| Sampson E     | 2009 | Brit J Psych            | 195 | 61    | 66    | 6  | 710 N  |
| Best O        | 2013 | Intern Med J            | 43  | 912   | 918   | 7  | 329 N  |
| Ryan D        | 2013 | BMJ                     | 3   | 0     | 8     | 9  | 311 N  |
| Hall R        | 2011 | Dem Ger Cog Dis         | 32  | 79    | 93    | 14 | 235 N  |
| Meagher D     | 2011 | J Psychosom Res         | 71  | 395   | 403   | 9  | 100 N  |
| Van Munst B   | 2010 | Int J Ger Psych         | 25  | 234   | 239   | 6  | 412 N  |
| Davis D       | 2012 | Brain                   | 135 | 2809  | 2816  | 8  | 553 N  |
| Wilson K      | 2005 | Int J Ger Psych         | 20  | 154   | 159   | 5  | 100 N  |
| Serantes R    | 2006 | J Biol Chem             | 281 | 14632 | 14643 | 12 | 75 N   |
| Gaudreau J    | 2005 | J Pain Symp Man         | 29  | 368   | 375   | 8  | 52 N   |
| Regal P       | 2015 | Clinical Interven Aging | 10  | 473   | 480   | 8  | 116 Y  |
| Jackson T     | 2016 | Age Ageing              | 45  | 493   | 499   | 7  | 82 N   |

Medical\_Geriatric\_Articles\_N\_49

|               |                           |     |      |      |    |          |
|---------------|---------------------------|-----|------|------|----|----------|
| Dasgupta M    | 2014 Int J Geri Psych     | 29  | 497  | 505  | 9  | 1235 N   |
| Sivakumar L   | 2014 Stroke               | 45  | 1709 | 1715 | 6  | 100 N    |
| Francis J     | 1992 JAGS                 | 40  | 601  | 606  | 5  | 225 N    |
| Regal P       | 2014 JAGS                 | 62  | 1414 | 1415 | 2  | 106 N    |
| Taheri A      | 2014 JAGS                 | 62  | 1551 | 1555 | 5  | 63 N     |
| Caeiro L      | 2014 Eur J Neurology      | 11  | 699  | 704  | 5  | 74 N     |
| Gaudreau J    | 2005 J Clin Oncol         | 23  | 6712 | 6718 | 9  | 261 Y    |
| Henon H       | 1999 Stroke               | 30  | 773  | 779  | 7  | 202 N    |
| Agostini J    | 2001 Arch Intern Med      | 161 | 2091 | 2097 | 7  | 412 N    |
| Gagnon P      | 2000 J Pain Sympt Man     | 19  | 412  | 426  | 15 | 89 N     |
| Lawlor P      | 2000 Arch Intern Med      | 160 | 786  | 794  | 9  | 104 N    |
| Ljubisavlje V | 2003 Gen Hosp Psych       | 25  | 345  | 352  | 8  | 113 Y    |
| Morita T      | 2001 J Pain Sympt Man     | 22  | 997  | 1006 | 10 | 237 N    |
| Mussi C       | 1999 J Ger Neurol Psych   | 18  | 82   | 86   | 5  | 61 N     |
| Tuma R        | 2000 Arch Neurol          | 57  | 1727 | 1731 | 5  | 140 N    |
| Gustafson Y   | 1993 Cerebrvasc Dis       | 3   | 33   | 38   | 6  | 83 N     |
| McCusker J    | 1998 Intern Psychoger     | 10  | 421  | 433  | 13 | 67 N     |
| Lu J          | 2011 Arch Ger Gerontol    | 52  | 66   | 70   | 5  | 122 N    |
| McAiney C     | 2012 Canad Geriat J       | 15  | 2    | 6    | 5  | 411 N    |
| Johnson J     | 1992 JAGS                 | 40  | 316  | 319  | 4  | 235 N    |
| Mudge A       | 2013 Intern Med J         | 43  | 270  | 277  | 8  | 136 N    |
| Salih S       | 2012 J Nutr Health Aging  | 16  | 695  | 700  | 6  | 239 N    |
| Yoo JW        | 2013 Geriatr Gerontol Int | 13  | 342  | 350  | 9  | 518 N    |
| Regal P       | 2013 JAMA Intern Med      | 173 | 597  | 597  | 1  | 193 N    |
| Regal P       | 2013 JAGS                 | 61  | 173  | 173  | 1  | 647 Y    |
| Flacker J     | 1998 Am J Ger Psych       | 6   | 31   | 41   | 11 | 67 N     |
| Ritchie J     | 1996 Psychiatric Serv     | 47  | 727  | 730  | 4  | 199 N    |
| Robertssor B  | 1998 Int J Ger Psych      | 13  | 49   | 56   | 8  | 175 N    |
| Turco R       | 2013 J Ger Psych Neur     | 26  | 63   | 68   | 6  | 176 N    |
| Ittil T       | 1986 J Nerv Mental Dis    | 143 | 492  | 506  | 15 | 74 Y     |
| Rothberg M    | 2013 JAGS                 | 61  | 923  | 930  | 8  | 225028 N |
| Goldberg S    | 2013 BMJ                  | 347 | 1    | 13   | 12 | 600 N    |
| Zuliani G     | 2013 J Geront Med Sci     | 68  | 1296 | 1302 | 7  | 438 N    |
| Franco J      | 2010 J Neuropsych Clin Ns | 22  | 329  | 337  | 9  | 291 N    |
| Pedone C      | 2005 J Geront Med Sci     | 60  | 1576 | 1580 | 5  | 9061 N   |
| Chester J     | 2012 J Hosp Med           | 7   | 450  | 455  | 6  | 95 N     |
| Lees R        | 2013 Stroke               | 44  | 3078 | 3083 | 6  | 111 N    |
| Praditsuwa R  | 2013 Geriatr Gerontol Int | 13  | 972  | 977  | 6  | 225 N    |
| Hasegawa N    | 2013 Intern Psychoger     | 25  | 1877 | 1883 | 7  | 206 N    |
| Yoo J         | 2013 Geriatr Gerontol Int | 13  | 942  | 948  | 7  | 484 N    |
| Kobayashi D   | 2013 Am J Ger Psych       | 21  | 957  | 962  | 6  | 3570 N   |
| Lanctot K     | 2013 Intern Psychoger     | 25  | 500  | 507  | 8  | 60 N     |
| Speciale S    | 2005 JAGS                 | 53  | 1445 | 1446 | 2  | 956 N    |
| Miller J      | 1997 Applied Nurs Res     | 10  | 143  | 151  | 9  | 149 N    |
| Meagher D     | 2013 Am J Ger Psych       | 21  | 1223 | 1238 | 16 | 1080 N   |
| Regal P       | 2013 J Neurol Res         | 3   | 96   | 100  | 5  | 259 N    |
| Voyer P       | 2008 Int J Nurs Practice  | 14  | 165  | 177  | 13 | 226 N    |
| Avidan M      | 2009 Anesthesiology       | 111 | 964  | 970  | 6  | 575 N    |
| Grover S      | 2013 Psychiatry Research  | 206 | 68   | 74   | 7  | 160 N    |
| Franco J      | 2013 Psychosomatics       | 54  | 227  | 238  | 12 | 592 N    |
| Adamis D      | 2013 J Psych Res          | 47  | 996  | 971  | 5  | 551 N    |
| Melkas S      | 2012 Int J Ger Psych      | 27  | 401  | 408  | 8  | 263 N    |
| Joosten E     | 2014 BMC Geriatrics       | 14  | 1    | 9    | 9  | 220 N    |
| Lam C         | 2014 JAGS                 | 62  | 1649 | 1657 | 9  | 234 Y    |
| O'Regan NA    | 2014 JNNP                 | 85  | 1122 | 1131 | 9  | 265 N    |
| Meagher D     | 2007 Brit J Psych         | 190 | 135  | 141  | 7  | 100 N    |

Medical\_Geriatric\_Articles\_N\_49

|               |                              |     |      |      |    |         |
|---------------|------------------------------|-----|------|------|----|---------|
| Gonzalez M    | 2009 Psychosomatics          | 50  | 234  | 235  | 5  | 542 N   |
| Adamis D      | 2005 Age Ageing              | 34  | 72   | 83   | 14 | 94 N    |
| Ellett L      | 2014 JAGS                    | 62  | 1916 | 1922 | 7  | 36015 N |
| Davis D       | 2014 BMC Geriatrics          | 14  | 87   | 95   | 8  | 2197 N  |
| Marcantoni E  | 2014 Ann Intern Med          | 161 | 554  | 561  | 8  | 201 N   |
| Han J         | 2014 Academic Emerg Med      | 21  | 180  | 187  | 8  | 406 N   |
| Meagher D     | 2008 Psychosomatics          | 49  | 300  | 308  | 9  | 154 N   |
| Hein C        | 2014 JAMDA                   | 15  | 850  | 854  | 5  | 410 Y   |
| Han J         | 2011 Ann Emerg Med           | 57  | 662  | 671  | 10 | 202 N   |
| Han J         | 2011 Acad Emerg Med          | 18  | 451  | 457  | 7  | 628 N   |
| Carpenter C   | 2011 Acad Emerg Med          | 18  | 375  | 384  | 9  | 169 N   |
| Aly SS        | 2014 Advances Aging Research | 3   | 1    | 5    | 5  | 116 N   |
| De Sousa-I R  | 2012 Open J Prevent Med      | 2   | 190  | 195  | 6  | 140 N   |
| Doherty K     | 2014 Clin Interven Aging     | 9   | 2013 | 2018 | 6  | 268 N   |
| Khan A        | 2008 Acad Emerg Med          | 15  | 788  | 790  | 3  | 70 N    |
| Meagher D     | 2014 Br J Psych              | 205 | 478  | 485  | 8  | 311 N   |
| Holt R        | 2015 Age Ageing              | 44  | 42   | 45   | 4  | 437 N   |
| Kolanowsk A   | 2015 JAMDA                   | 16  | 37   | 40   | 4  | 103 N   |
| Khan A        | 2015 JAGS                    | 63  | 593  | 594  | 2  | 92 N    |
| Holt R        | 2013 Age Ageing              | 42  | 721  | 727  | 7  | 362 N   |
| Solberg L     | 2013 Geriatric Nursing       | 34  | 75   | 79   | 5  | 474 N   |
| Kratz A       | 2008 J Nurs Care Qual        | 23  | 331  | 337  | 7  | 137 N   |
| Martins S     | 2015 Intern Psychoger        | 27  | 777  | 784  | 8  | 208 N   |
| Rudolph J     | 2014 JAMDA                   | 15  | 957  | 966  | 11 | 1527 N  |
| Zaubler T     | 2013 Psychosomatics          | 54  | 219  | 226  | 8  | 595 N   |
| Tieges Z      | 2015 Intern Psychoger        | 27  | 1251 | 1262 | 12 | 156 N   |
| Jeffer K      | 2013 BMJ Open                | 3   | 1    | 8    | 7  | 648 N   |
| Hatta K       | 2014 JAMA Psychiatry         | 71  | 397  | 403  | 7  | 67 Y    |
| Anthony J     | 1982 Psycholog Med           | 12  | 397  | 408  | 11 | 99 N    |
| Erkinjuntti T | 1986 Arch Intern Med         | 146 | 1923 | 1926 | 4  | 2000 N  |
| Jitapunkul S  | 1992 QJM                     | 300 | 307  | 314  | 8  | 184 N   |
| Pendlebury S  | 2015 Age Ageing              | 44  | 1000 | 1005 | 6  | 264 N   |
| Boettger S    | 2011 Palliative Support Care | 9   | 129  | 135  | 7  | 100 N   |
| Davis D       | 2015 Am J Geriatr Psych      | 23  | 403  | 415  | 13 | 465 N   |
| Liu C         | 2004 Intern Clin Psychphar   | 19  | 164  | 168  | 5  | 78 N    |
| Morita T      | 2004 Psychosomatics          | 45  | 107  | 113  | 7  | 208 N   |
| Rahkonen T    | 2000 Intern Psychoger        | 12  | 473  | 481  | 8  | 51 N    |
| Speciale S    | 2008 Age Ageing              | 37  | 122  | 123  | 2  | 110 N   |
| Spiller J     | 2006 Palliative Med          | 20  | 17   | 23   | 6  | 209 N   |
| Yates C       | 2009 Age Ageing              | 38  | 235  | 237  | 3  | 62 N    |
| Mitchell R    | 2015 Intern Psychoger        | 27  | 1757 | 1768 | 12 | 16691 N |
| Gagnon B      | 2001 J Pain Sympt Man        | 22  | 826  | 833  | 7  | 104 N   |
| Bellelli G    | 2011 JAMDA                   | 12  | 578  | 583  | 6  | 60 Y    |
| Figiel G      | 1990 J Neuropsychiatry       | 2   | 53   | 58   | 6  | 87 N    |
| Ross C        | 1991 Intern Psychoger        | 3   | 135  | 147  | 13 | 58 N    |
| Adamis D      | 2007 Int J Ger Psych         | 22  | 688  | 694  | 9  | 164 N   |
| Cobb J        | 2000 Cancer Practice         | 8   | 172  | 177  | 6  | 210 N   |
| Curtyo K      | 2001 Am J Ger Psych          | 9   | 141  | 147  | 7  | 102 N   |
| Franco G      | 2014 Psychiatry Res          | 220 | 975  | 981  | 7  | 291 N   |
| Meagher D     | 2014 BMC Medicine            | 12  | 164  | 169  | 5  | 768 N   |
| Carrasco M    | 2014 Age Ageing              | 43  | 346  | 351  | 6  | 374 N   |
| Adamis D      | 2015 Intern Psychoger        | 27  | 883  | 889  | 7  | 200 N   |
| Pendelbury S  | 2015 BMJ Open                | 5   | 1    | 8    | 8  | 503 Y   |
| Chong E       | 2015 Intern Psychoger        | 27  | 1695 | 1705 | 11 | 234 N   |
| Zeng L        | 2015 Alz Dis Assoc Disord    | 29  | 312  | 316  | 5  | 162 N   |
| Tosto G       | 2015 Acta Neurol Scand       | 132 | 417  | 422  | 6  | 153 N   |

Medical\_Geriatric\_Articles\_N\_49

|              |                              |     |      |      |    |         |
|--------------|------------------------------|-----|------|------|----|---------|
| Goldberg A   | 2015 BMC Geriatrics          | 15  | 69   | 76   | 9  | 994 N   |
| Verloo H     | 2016 Clin Interven Aging     | 11  | 55   | 63   | 9  | 114 N   |
| Pendlebury S | 2016 Age Ageing              | 45  | 60   | 65   | 6  | 308 N   |
| Fick D       | 2013 J Hosp Med              | 8   | 500  | 505  | 6  | 139 Y   |
| Lakatos B    | 2009 Psychosomatics          | 50  | 218  | 226  | 9  | 252 N   |
| Martinez J   | 2012 BMJ Open                | 2   | 5    | 11   | 7  | 397 N   |
| Babine R     | 2013 Nursing                 | 43  | 18   | 21   | 4  | 153 N   |
| Uthamaling S | 2011 Am J Cardiology         | 108 | 402  | 408  | 7  | 883 N   |
| Bond S       | 2006 Oncology Nursing        | 33  | 1075 | 1083 | 9  | 76 N    |
| Santangelc A | 2010 European Psych          | 25  | 588  | 591  | 4  | 123 N   |
| Inouye S     | 1993 J Gen Intern Med        | 8   | 645  | 652  | 8  | 188 N   |
| Miu D        | 2016 Geriatr Gerontol Int    | 16  | 586  | 592  | 7  | 261 N   |
| Wahlund L    | 1999 Dem Ger Cog Disord      | 10  | 389  | 392  | 4  | 637 N   |
| Veilla N     | 2012 Dem Ger Cog Disord      | 34  | 332  | 336  | 5  | 85 N    |
| Travers C    | 2014 Austra J Ageing         | 33  | 55   | 58   | 4  | 493 N   |
| Traynor V    | 2016 Austra J Ageing         | 35  | 54   | 57   | 4  | 205 N   |
| Schuckit M   | 1995 Addiction               | 90  | 1335 | 1347 | 13 | 1648 N  |
| Kuhn E       | 2014 PLOS ONE                | 9   | 11   | 18   | 7  | 95 N    |
| Uremura A    | 2014 PLOS ONE                | 9   | 6    | 12   | 6  | 90 N    |
| Douglas V    | 2013 J Hosp Med              | 8   | 493  | 499  | 7  | 374 N   |
| Verloo H     | 2015 Demen Ger Cog Disor Ex  | 5   | 176  | 190  | 15 | 103 N   |
| Trzepacz P   | 1998 J Neuropsychiatry       | 10  | 199  | 204  | 6  | 843 N   |
| Shulman R    | 2016 BMC Geriatrics          | 16  | 44   | 22   | 8  | 80 N    |
| Hendry K     | 2015 BMC Geriatrics          | 15  | 17   | 22   | 6  | 161 N   |
| Lin H        | 2015 Australasian J Ageing   | 34  | 259  | 264  | 5  | 100 N   |
| Hu H         | 2004 Chongging Med           |     | 1234 | 1238 | 5  | 175 N   |
| Bruera E     | 2009 Cancer                  | 115 | 2004 | 2012 | 9  | 99 N    |
| Grover S     | 2011 Gen Hosp Psych          | 33  | 637  | 639  | 3  | 53 N    |
| Hardy J      | 2008 Emerg Med Australia     | 20  | 420  | 424  | 5  | 106 N   |
| Kennedy M    | 2012 Acad Emerg Med          | 19  | 147  | 147  | 1  | 706 N   |
| Herzig S     | 2016 JAGS                    | 64  | 299  | 305  | 7  | 17775 N |
| Goh A        | 2016 Psychogeriatrics        | 16  | 12   | 19   | 8  | 165 N   |
| Ritchie C    | 2014 Int Psychoger           | 26  | 717  | 24   | 8  | 710 N   |
| Otremba I    | 2016 Clin Interven Aging     | 11  | 397  | 405  | 9  | 675 N   |
| Bellelli G   | 2016 JAMDA                   | 17  | 214  | 219  | 5  | 2477 N  |
| Nicholas L   | 1995 Psychosomatics          | 36  | 471  | 479  | 8  | 737 N   |
| Kolbeinsso H | 1993 Acta Psych Scand        | 87  | 123  | 127  | 5  | 272 N   |
| Luukhanen M  | 2011 Dem Ger Cog Dis Xtra    | 1   | 143  | 150  | 8  | 425 N   |
| Muresan M    | 2016 Int J Ger Psych         | 31  | 349  | 354  | 6  | 200 N   |
| Rudolph J    | 2016 JAMDA                   | 17  | 244  | 248  | 5  | 246 N   |
| Vermeersc P  | 1990 Applied Nurs Res        | 3   | 125  | 133  | 9  | 129 N   |
| Naughton B   | 1997 Acad Emerg Med          | 4   | 1107 | 1110 | 4  | 333 N   |
| Voyer P      | 2006 Clin Nurs Res           | 15  | 46   | 66   | 21 | 104 N   |
| Naja M       | 2016 Geriatr Gerontol Int    | 16  | 424  | 433  | 10 | 102 Y   |
| Fok M        | 2015 Int J Geriat Psych      | 30  | 333  | 344  | 12 | 1710 N  |
| Boustani M   | 2010 J Hosp Med              | 5   | 69   | 75   | 6  | 997 N   |
| Laurila J    | 2008 J Geront Med Sci        | 63  | 1124 | 1126 | 3  | 425 N   |
| Maneeton B   | 2013 Drug Des Devel Ther     | 24  | 657  | 667  | 11 | 52 N    |
| Voyer P      | 2015 BMC Nursing             | 14  | 19   | 33   | 15 | 193 N   |
| Voyer P      | 2016 Intern Psychoger        | 28  | 1293 | 1301 | 9  | 191 N   |
| Stroomer-v A | 2016 Intern Psychoger        | 28  | 1303 | 1311 | 9  | 88 N    |
| Tay L        | 2013 J Hospital Medicine     | 8   | 321  | 327  | 7  | 122 N   |
| Grover S     | 2014 Psychiatry Clin Neurosc | 68  | 644  | 651  | 8  | 205 N   |
| Takeuchi T   | 2005 Psychiatry Clin Neurosc | 59  | 253  | 258  | 6  | 454 N   |
| Joosten E    | 2006 Gerontology             | 52  | 382  | 385  | 4  | 190 N   |
| Kim S        | 2015 Psychosomatic Med       | 77  | 903  | 910  | 8  | 322 N   |

Medical\_Geriatric\_Articles\_N\_49

|            |   |      |                            |    |      |      |   |         |
|------------|---|------|----------------------------|----|------|------|---|---------|
| Adamis     | D | 2005 | J Geriatr Psych Neurol     | 18 | 129  | 133  | 5 | 59 N    |
| Gallerani  | M | 2013 | Acta Neuropsychiatrica     | 25 | 179  | 183  | 5 | 74379 N |
| Adamis     | D | 2011 | Archiv Gerontol Geriatrics | 52 | 276  | 280  | 5 | 164 N   |
| Speciale   | S | 2007 | J Gerontol Med Sci         | 62 | 107  | 108  | 2 | 58 N    |
| Adamis     | D | 2007 | Age Ageing                 | 36 | 644  | 649  | 5 | 164 N   |
| Bellelli   | G | 2007 | J Gerontol Med Sci         | 62 | 1182 | 1183 | 2 | 1864 N  |
| Edlund     | A | 2007 | J Geriatr Psych Neurol     | 20 | 166  | 171  | 6 | 717 N   |
| Edlund     | A | 2006 | J Geriatr Psych Neurol     | 19 | 83   | 90   | 8 | 400 N   |
| Esperanza  | A | 2004 | Archiv Gerontol Geriatrics | 9  | 149  | 153  | 4 | 107 N   |
| Cole       | M | 2015 | JAGS                       | 63 | 2340 | 2348 | 9 | 278 N   |
| Grover     | S | 2014 | Psychiatry Clin Neuro      | 68 | 283  | 291  | 8 | 321 N   |
| Vasunilash | S | 2016 | J Gen Intern Med           | 31 |      |      | 8 | 1485 N  |
| Manepalli  | J | 1990 | J Geriatr Psych Neurol     | 3  | 198  | 202  | 5 | 407 N   |
| Thomas     | C | 2008 | JNNP                       | 79 | 119  | 125  | 7 | 50 N    |





|   |   |   |         |    |   |   |
|---|---|---|---------|----|---|---|
| N |   | N | Nil     |    | N | N |
| Y | 3 | N | CAM     | 7  | N | N |
| N |   | N | Nil     |    | N | N |
| N |   | N | DRS-R98 |    | N | N |
| N |   | Y | Y       | 2  | Y | Y |
| N |   | N | Nil     |    | N | N |
| N |   | N | Nil     |    | N | N |
| N |   | N | Nil     |    | N | N |
| N |   | N | Nil     |    | Y | N |
| N |   | N | Nil     |    | N | N |
| N |   | N | Nil     |    | Y | Y |
| N |   | N | Nil     |    | N | N |
| N |   | Y | Nil     | 15 | Y | Y |
| N |   | N | Nil     |    | N | N |
| N |   | N | Nil     |    | N | N |
| Y | 4 | N | Nil     |    | N | N |
| N |   | Y | Nil     |    | Y | Y |
| N |   | N | Nil     |    | N | N |
| N |   | N | CAM     |    | N | N |
| N |   | Y | Nil     |    | Y | Y |
| Y |   | N | DI      |    | N | N |
| N |   | Y | Nil     |    | Y | Y |
| N |   | N | Nil     |    | N | N |
| N |   | N | Nil     |    | N | N |
| N |   | N | DRS     |    | N | N |
| N |   | N | Nil     |    | Y | Y |
| N |   | Y | Nil     | 10 | 5 | N |
| N |   | N | Nil     |    | N | N |
| Y |   | Y | CAM     |    | N | N |
| N |   | N | Nil     |    | N | N |
| N |   | N | Nil     |    | N | N |
| N |   | N | Nil     |    | N | N |
| N |   | N | Nil     |    | N | N |
| N |   | Y | Nil     | 7  | N | N |
| N |   | N | Nil     |    | N | N |
| N |   | N | DRS     | 7  | N | N |
| N |   | N | Nil     |    | N | N |
| N |   | N | Nil     |    | N | N |
| N |   | N | Nil     |    | N | N |
| N |   | N | Nil     |    | N | N |
| N |   | N | Nil     |    | N | N |
| N |   | Y | Nil     |    | Y | Y |
| N |   | N | Nil     |    | N | N |
| N |   | Y | Nil     |    | Y | Y |
| N |   | N | Nil     |    | N | N |
| N |   | N | Nil     |    | N | N |
| N |   | N | Nil     |    | N | N |
| N |   | N | Nil     |    | N | N |
| N |   | Y | Nil     |    | Y | Y |
| N |   | N | Nil     |    | N | N |
| N |   | N | Nil     |    | Y | N |
| N |   | N | Nil     |    | Y | Y |
| N |   | N | Nil     |    | N | N |

|   |   |   |         |    |   |   |
|---|---|---|---------|----|---|---|
| N |   | N | Nil     |    | N | N |
| N |   | N | Nil     |    | N | N |
| N |   | N | Nil     | 3  | Y | N |
| N |   | N | Nil     |    | N | N |
| N |   | Y | Nil     | 1  | Y | N |
| N |   | N | Nil     |    | Y | N |
| N |   | N | Nil     |    | Y | N |
| N |   | N | Nil     |    | N | N |
| N |   | N | Nil     |    | N | N |
| N |   | N | Nil     |    | N | N |
| N |   | N | Nil     |    | N | N |
| N |   | Y | Nil     |    | Y | Y |
| N |   | N | Nil     |    | N | N |
| N |   | N | Nil     |    | Y | N |
| N |   | N | Nil     |    | N | N |
| N |   | N | Nil     |    | N | N |
| N |   | N | Nil     |    | Y | N |
| N |   | N | DRS-R98 | 8  | N | N |
| N |   | N | Nil     |    | Y | N |
| N |   | N | Nil     |    | N | N |
| N |   | N | Nil     |    | N | N |
| N |   | N | Nil     |    | N | N |
| N |   | N | Nil     |    | N | N |
| N |   | Y | MDAS    |    | Y | N |
| N |   | N | Nil     |    | N | N |
| N |   | N | Nil     |    | Y | Y |
| N |   | N | Nil     |    | N | N |
| N |   | N | Nil     |    | N | N |
| N |   | N | Nil     |    | N | N |
| Y | 1 | N | Nil     |    | N | N |
| N |   | N | Nil     |    | N | N |
| N |   | N | Nil     |    | Y | N |
| N |   | N | Nil     |    | N | N |
| N |   | Y | Nil     |    | Y | Y |
| N |   | N | Nil     |    | N | N |
| N |   | Y | Nil     |    | Y | Y |
| N |   | N | Nil     |    | N | N |
| N |   | N | Nil     |    | N | N |
| N |   | N | Nil     |    | N | N |
| N |   | N | Nil     |    | N | N |
| N |   | N | Nil     |    | N | N |
| N |   | N | Nil     |    | N | N |
| N |   | N | Nil     |    | N | N |
| N |   | N | Nil     |    | N | N |
| N |   | N | Nil     |    | N | N |
| N |   | N | Nil     |    | N | N |
| N |   | Y | Nil     | 20 | Y | Y |
| N |   | N | Nil     |    | N | N |



Medical\_Geriatric\_Articles\_N\_49

|   |   |   |          |    |   |   |
|---|---|---|----------|----|---|---|
| N |   | N | Nil      |    | Y | Y |
| N |   | Y | MOCA     |    | Y | N |
| N |   | N | Nil      |    | Y | N |
| N |   | N | Y        |    | N | N |
| N |   | N | Nil      |    | N | N |
| N |   | N | Nil      |    | N | N |
| Y | 8 | N | Nil      |    | N | N |
| N |   | N | Nil      |    | Y | Y |
| N |   | N | Nil      |    | Y | N |
| N |   | N | Nil      |    | N | N |
| N |   | Y | MDAS     | 6  | N | N |
| Y | 3 | Y | CAM      | 2  | N | N |
| N |   | N | MDAS     |    | Y | N |
| N |   | N | Nil      |    | N | N |
| N |   | N | Nil      |    | Y | N |
| N |   | N | Nil      |    | N | N |
| N |   | N | DRS      |    | N | N |
| N |   | Y | Nil      | 16 | Y | Y |
| N |   | N | Nil      |    | N | N |
| N |   | N | Nil      |    | N | N |
| N |   | Y | Nil      |    | Y | Y |
| N |   | N | Nil      |    | Y | N |
| N |   | N | Nil      |    | Y | Y |
| Y |   | Y | Nil      |    | Y | Y |
| N |   | N | Nil      |    | N | N |
| N |   | N | Nil      |    | N | N |
| N |   | N | Nil      |    | N | N |
| N |   | N | Nil      |    | Y | Y |
| Y | 1 | N | Y        |    | N | N |
| N |   | N | Nil      |    | N | N |
| N |   | N | Nil      |    | N | N |
| N |   | N | Nil      |    | N | N |
| N |   | N | Nil      |    | N | N |
| N |   | N | Nil      |    | N | N |
| N |   | N | Nil      |    | N | N |
| N |   | N | Nil      |    | N | N |
| N |   | N | Nil      |    | N | N |
| N |   | N | Nil      |    | N | N |
| N |   | N | Nil      |    | N | N |
| N |   | N | Nil      |    | N | N |
| N |   | N | Nil      |    | N | N |
| N |   | N | Nil      |    | N | N |
| N |   | N | Nil      |    | N | N |
| N |   | N | Nil      |    | N | N |
| N |   | N | Nil      |    | N | N |
| N |   | N | Nil      |    | N | N |
| N |   | N | Nil      |    | N | N |
| N |   | N | Nil      |    | N | N |
| N |   | N | Nil      |    | N | N |
| N |   | N | Nil      |    | N | N |
| N |   | N | Multiple |    | N | N |
| N |   | Y | Nil      |    | Y | Y |
| N |   | N | Nil      |    | N | N |
| N |   | N | Nil      |    | N | N |
| N |   | N | Nil      |    | N | N |
| N |   | N | Nil      |    | N | N |
| N |   | Y | DRS-R98  |    | N | N |
| N |   | N | Nil      |    | Y | Y |
| N |   | N | Nil      |    | Y | N |
| Y |   | Y | DRS-R98  | 5  | Y | Y |
| N |   | N | Nil      |    | N | N |
| N |   | N | DRS-R98  |    | N | N |

|   |   |   |         |   |   |   |
|---|---|---|---------|---|---|---|
| N |   | N | Nil     |   | Y | N |
| N |   | N | Nil     |   | N | N |
| N |   | N | Nil     |   | N | N |
| N |   | N | Nil     |   | N | N |
| N |   | N | Nil     |   | N | N |
| N |   | N | Nil     |   | N | N |
| N |   | N | Nil     |   | N | N |
| Y | 4 | N | DRS-R98 |   | N | N |
| N |   | N | Nil     |   | N | N |
| N |   | N | Nil     |   | N | N |
| N |   | N | Nil     |   | N | N |
| N |   | N | Nil     |   | N | N |
| N |   | N | Nil     |   | N | N |
| N |   | N | Nil     |   | N | N |
| N |   | N | Nil     |   | Y | N |
| N |   | N | Nil     |   | N | N |
| N |   | Y | Nil     |   | N | N |
| N |   | N | Nil     |   | Y | N |
| N |   | N | Nil     |   | Y | N |
| N |   | N | DRS-R98 |   | N | N |
| N |   | N | Nil     |   | N | N |
| N |   | N | Nil     |   | N | N |
| N |   | N | Nil     |   | N | N |
| N |   | N | Nil     |   | N | N |
| N |   | Y | Nil     |   | N | N |
| N |   | N | Nil     |   | N | N |
| N |   | Y | Y       | 2 | Y | Y |
| Y | 6 | N | Nil     |   | N | N |
| N |   | N | Nil     |   | N | N |
| N |   | N | Nil     |   | N | N |
| N |   | N | Nil     |   | N | N |
| N |   | N | Nil     |   | N | N |
| N |   | N | Nil     |   | N | N |
| N |   | N | Nil     |   | N | N |
| N |   | N | Nil     |   | N | N |
| N |   | N | Nil     |   | N | N |
| N |   | N | Nil     |   | N | N |
| N |   | N | Nil     |   | N | N |
| N |   | N | Nil     |   | N | N |
| N |   | N | Nil     |   | N | N |
| N |   | N | Nil     |   | N | N |
| N |   | N | Nil     |   | N | N |
| N |   | N | Nil     |   | N | N |
| N |   | N | Nil     |   | N | N |
| N |   | N | Nil     |   | N | N |
| N |   | N | Nil     |   | N | N |
| N |   | N | Nil     |   | N | N |
| N |   | N | Nil     |   | N | N |
| N |   | N | Nil     |   | N | N |
| N |   | N | Nil     |   | N | N |
| N |   | N | Nil     |   | N | N |
| N |   | N | Nil     |   | N | N |
| N |   | N | Nil     |   | N | N |
| N |   | N | DRS-R98 |   | Y | N |
| N |   | N | Nil     |   | N | N |
| N |   | N | Nil     |   | N | N |
| N |   | N | Nil     |   | N | N |
| N |   | N | Nil     |   | N | N |
| N |   | N | Nil     |   | N | N |
| N |   | N | Nil     |   | N | N |
| N |   | N | Nil     |   | N | N |
| N |   | N | Nil     |   | N | N |
| N |   | N | Nil     |   | N | N |
| N |   | N | DRS     |   | Y | N |
| N |   | N | Nil     |   | N | N |
| N |   | N | Nil     |   | N | N |

|   |   |        |   |      |   |
|---|---|--------|---|------|---|
| N | N | Nil    |   | N    | N |
| N | N | Nil    |   | N    | N |
| N | N | Nil    |   | N    | N |
| N | Y | Nil    |   | Y    | N |
| N | N | Nil    |   | N    | N |
| N | N | Nil    |   | N    | N |
| N | N | Nil    |   | N    | N |
| N | N | Nil    |   | N    | N |
| N | Y | Nil    |   | 11 N | N |
| N | N | Nil    |   | Y    | N |
| N | N | Nil    |   | N    | N |
| N | N | Nil    |   | N    | N |
| N | N | CAM    |   | 7 Y  | Y |
| N | N | Nil    |   | N    | N |
| N | N | Nil    |   | N    | N |
| N | N | Nil    |   | 6 Y  | Y |
| N | N | Nil    |   | N    | N |
| N | N | Nil    |   | N    | N |
| N | N | Nil    |   | N    | N |
| N | N | Nil    |   | N    | N |
| N | N | CAM    |   | N    | N |
| N | N | Nil    |   | N    | N |
| N | N | Nil    |   | N    | N |
| N | N | Nil    |   | N    | N |
| N | N | Nil    |   | N    | N |
| N | N | Nil    |   | N    | N |
| N | N | Nil    |   | N    | N |
| N | Y | MDAS   | 3 | N    | N |
| N | N | Nil    |   | N    | N |
| N | N | Nil    |   | N    | N |
| N | N | Nil    |   | N    | N |
| N | N | Nil    |   | N    | N |
| N | N | Nil    |   | N    | N |
| N | N | Nil    |   | N    | N |
| N | N | Nil    |   | N    | N |
| N | N | Nil    |   | N    | N |
| N | N | Nil    |   | N    | N |
| N | N | Nil    |   | N    | N |
| N | N | Nil    |   | Y    | N |
| N | N | Nil    |   | Y    | Y |
| N | N | Nil    |   | N    | N |
| N | N | Nil    |   | N    | N |
| N | N | Nil    |   | N    | N |
| N | N | Nil    |   | N    | N |
| N | N | Nil    |   | N    | N |
| N | N | Nil    |   | N    | N |
| N | N | Nil    |   | N    | N |
| N | N | Nil    |   | N    | N |
| Y | 3 | N      |   | N    | N |
| N | N | Nil    |   | N    | N |
| N | N | Nil    |   | N    | Y |
| N | N | Nil    |   | Y    | N |
| N | N | Nil    |   | N    | N |
| N | Y | DRSR98 |   | N    | N |
| N | N | Nil    |   | N    | N |
| N | N | Nil    |   | N    | N |
| N | N | Nil    |   | N    | N |
| N | Y | DRSR98 | 8 | N    | Y |
| N | N | Nil    |   | N    | N |
| N | Y | Nil    | 7 | N    | N |
| N | N | Nil    |   | N    | N |
| N | Y | Nil    |   | 90 Y | N |

Medical\_Geriatric\_Articles\_N\_49

|   |   |       |    |     |   |
|---|---|-------|----|-----|---|
| N | N | Nil   |    | N   | N |
| N | N | Nil   |    | 8 Y | N |
| N | Y | Nil   |    | N   | N |
| N | Y | Nil   | 11 | Y   | N |
| N | N | Nil   |    | 9 Y | N |
| N | N | Nil   |    | Y   | N |
| N | N | Nil   |    | N   | N |
| N | N | Nil   |    | 9 Y | N |
| N | N | Nil   |    | Y   | Y |
| N | N | Nil   |    | Y   | Y |
| N | N | Nil   |    | N   | N |
| Y | Y | CAM-S | 3  | 8 Y | Y |
| N | N | Nil   |    | N   | N |
| N | N | Nil   |    | N   | N |



ne
